# Supplementary material for: TeraVR empowers precise reconstruction of complete 3-D neuronal morphology in the whole brain
Source: PubMed Central journal article supplement (PMC6677772; doi:10.1038/s41467-019-11443-y), 2019-08-02
Supplement: 41467_2019_11443_MOESM2_ESM.pdf [file 41467_2019_11443_MOESM2_ESM.pdf]

## Description of Additional Supplementary Files

**File name:** Supplementary Movie 1

**Description:** Zoom in and zoom out functions of TeraVR.

**File name:** Supplementary Movie 2

**Description:** Translation / shift to an adjacent image area in TeraVR.

**File name:** Supplementary Movie 3

**Description:** An example of neurite-tracing using TeraVR.

**File name:** Supplementary Movie 4

**Description:** Examples of neurite-deletion and undo/redo operations in TeraVR.

**File name:** Supplementary Movie 5

**Description:** Addition and removal of markers in TeraVR.

**File name:** Supplementary Movie 6

**Description:** Examples of splitting and subdividing of a tract and dragging nodes (control points) of a tract in TeraVR.

**File name:** Supplementary Movie 7

**Description:** An example of adjusting contrast in TeraVR.

**File name:** Supplementary Movie 8

**Description:** Examples of displaying and hiding of annotations in TeraVR.

**File name:** Supplementary Movie 9

**Description:** An example of changing colors of annotations in TeraVR.

**File name:** Supplementary Movie 10

**Description:** An example of switching image channels in TeraVR.

**File name:** Supplementary Movie 11

**Description:** Automatic rotation of an image volume in TeraVR.

**File name:** Supplementary Movie 12

**Description:** A mixed-reality based demonstration on how TeraVR works.
